# Supplementary material
Source: Springer Nature journal article supplement (https://www.springermedizin.de/resource/supplementary/12877_2013_981_MOESM2_ESM.pdf/9440832)
Supplement: MOESM2 [file 9440832]

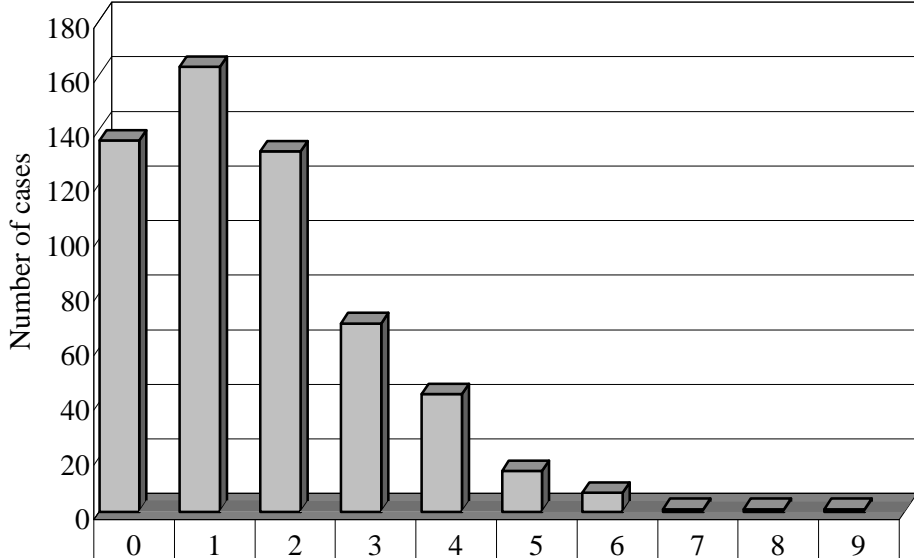

|                 |       |       |       |       |      |      |      |      |      |      |
|-----------------|-------|-------|-------|-------|------|------|------|------|------|------|
| Number of cases | 136   | 163   | 132   | 69    | 43   | 15   | 7    | 1    | 1    | 1    |
| Percentage      | 23.9% | 28.7% | 23.2% | 12.1% | 7.6% | 2.6% | 1.2% | 0.2% | 0.2% | 0.2% |

Number of various complications in the rehabilitation ward  
(first hospitalization)
